# Supplementary material for: Skeletal muscle‐specific DJ‐1 ablation‐induced atrogenes expression and mitochondrial dysfunction contributing to muscular atrophy
Source: PubMed Central journal article supplement — J Cachexia Sarcopenia Muscle. 2023 Jul 19;14(5):2126–42. doi: 10.1002/jcsm.13290 (PMC10570112; doi:10.1002/jcsm.13290), 2023-07-19

(A)

| Donor  | Gender | Age | Height (m) | BW (kg) | BMI (m/kg <sup>2</sup> ) | FBG (mmol/L) |
|--------|--------|-----|------------|---------|--------------------------|--------------|
| Donor1 | M      | 28  | 1.82       | 74      | 22.34                    | 6.50         |
| Donor2 | M      | 29  | 1.81       | 75      | 22.89                    | 6.30         |
| Donor3 | M      | 88  | 1.65       | 57.5    | 21.1                     | 7.10         |
| Donor4 | M      | 65  | 1.7        | 70      | 24.20                    | 4.30         |
| Donor5 | F      | 15  | 1.72       | 64      | 21.63                    | 7.00         |
| Donor6 | F      | 26  | 1.70       | 60      | 20.76                    | 8.50         |
| Donor7 | F      | 58  | 1.51       | 67      | 29.40                    | 5.20         |
| Donor8 | F      | 69  | 1.55       | 65      | 27.10                    | 7.30         |

(B)

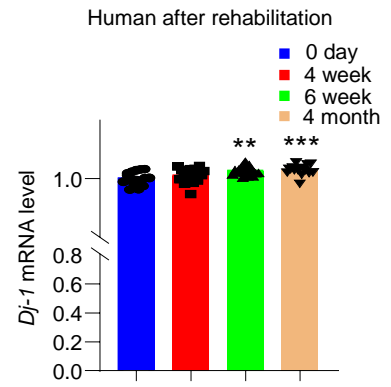

(C)

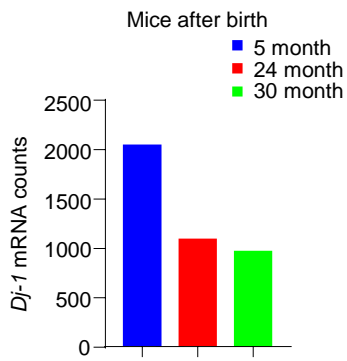

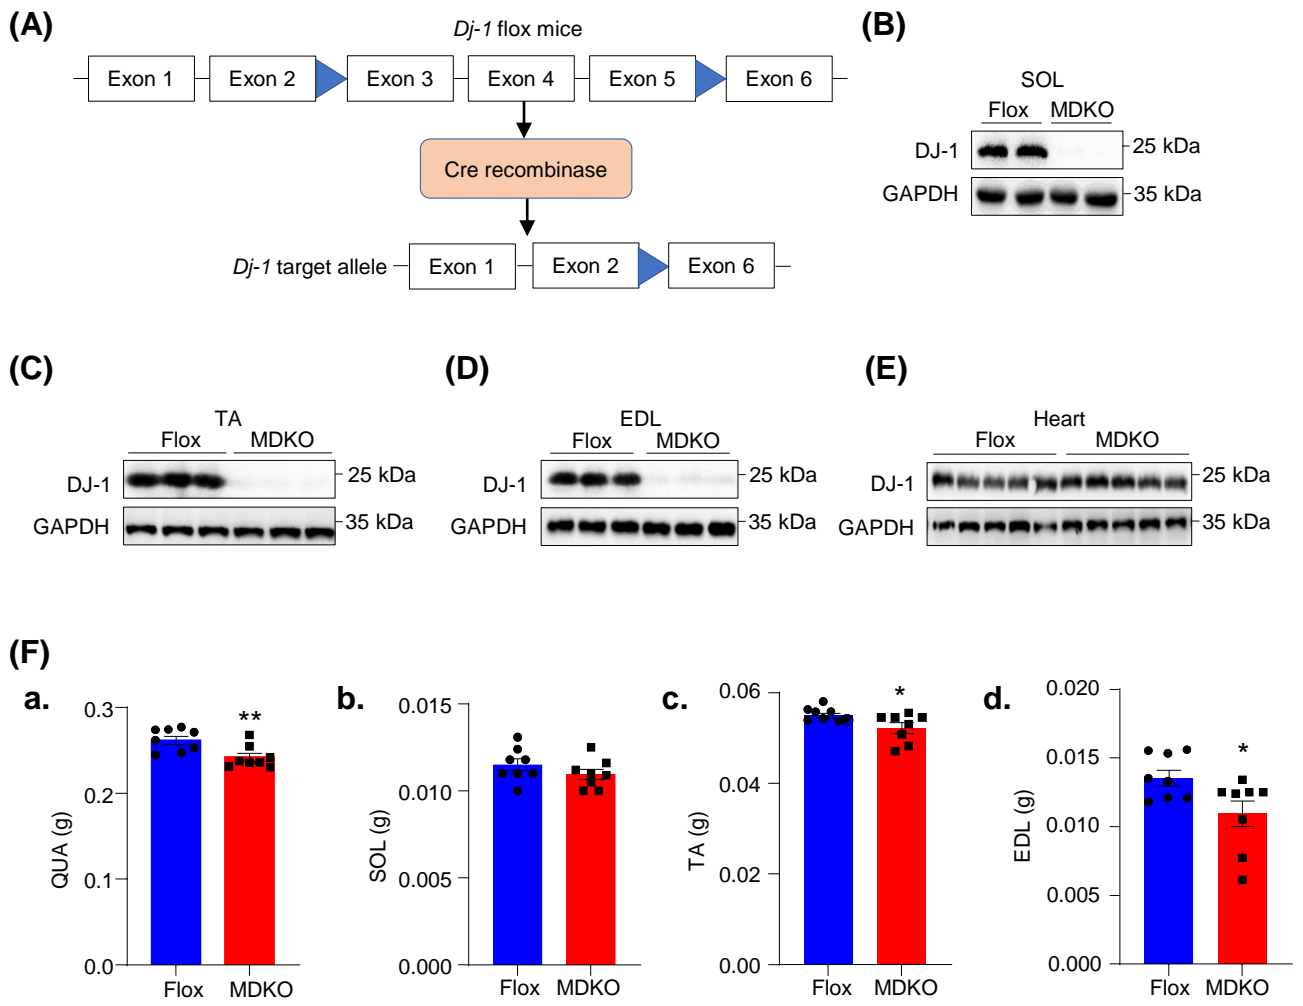

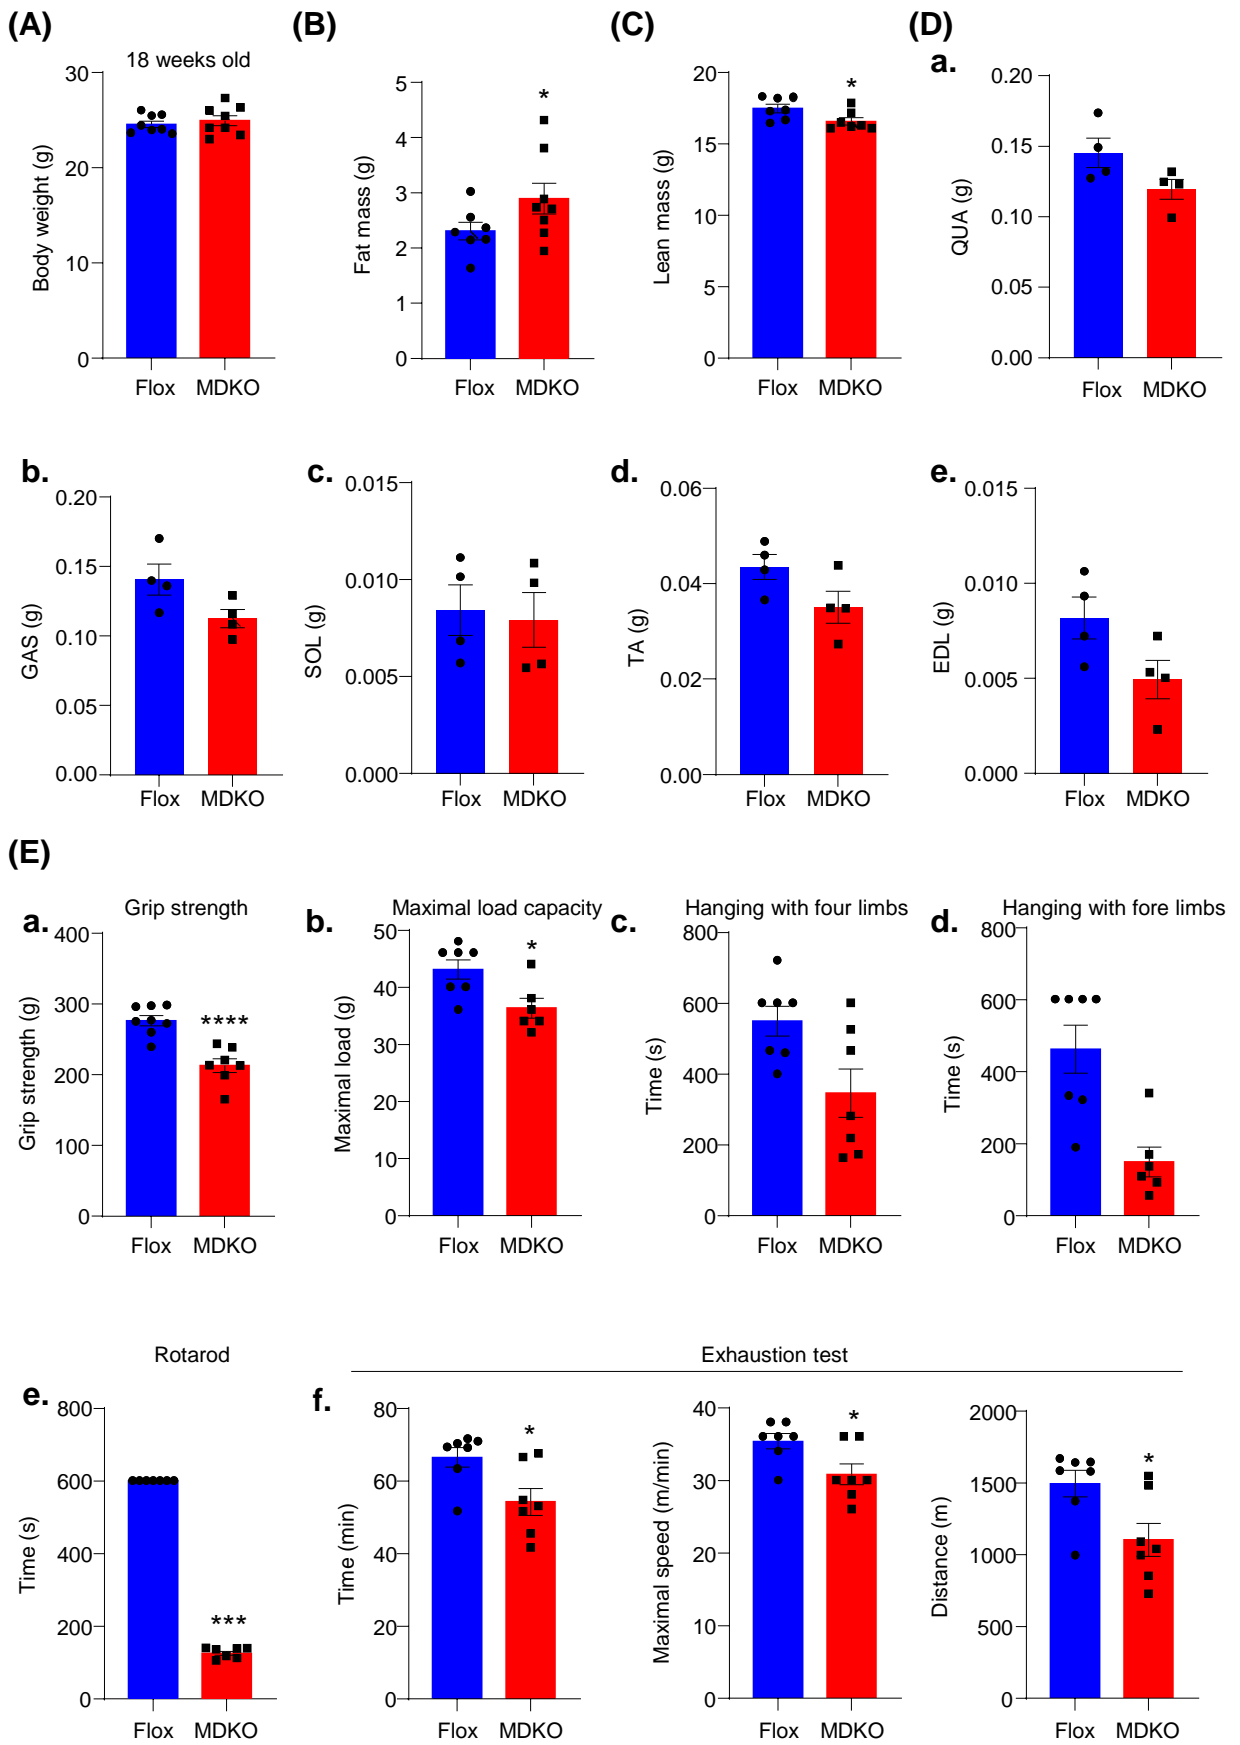

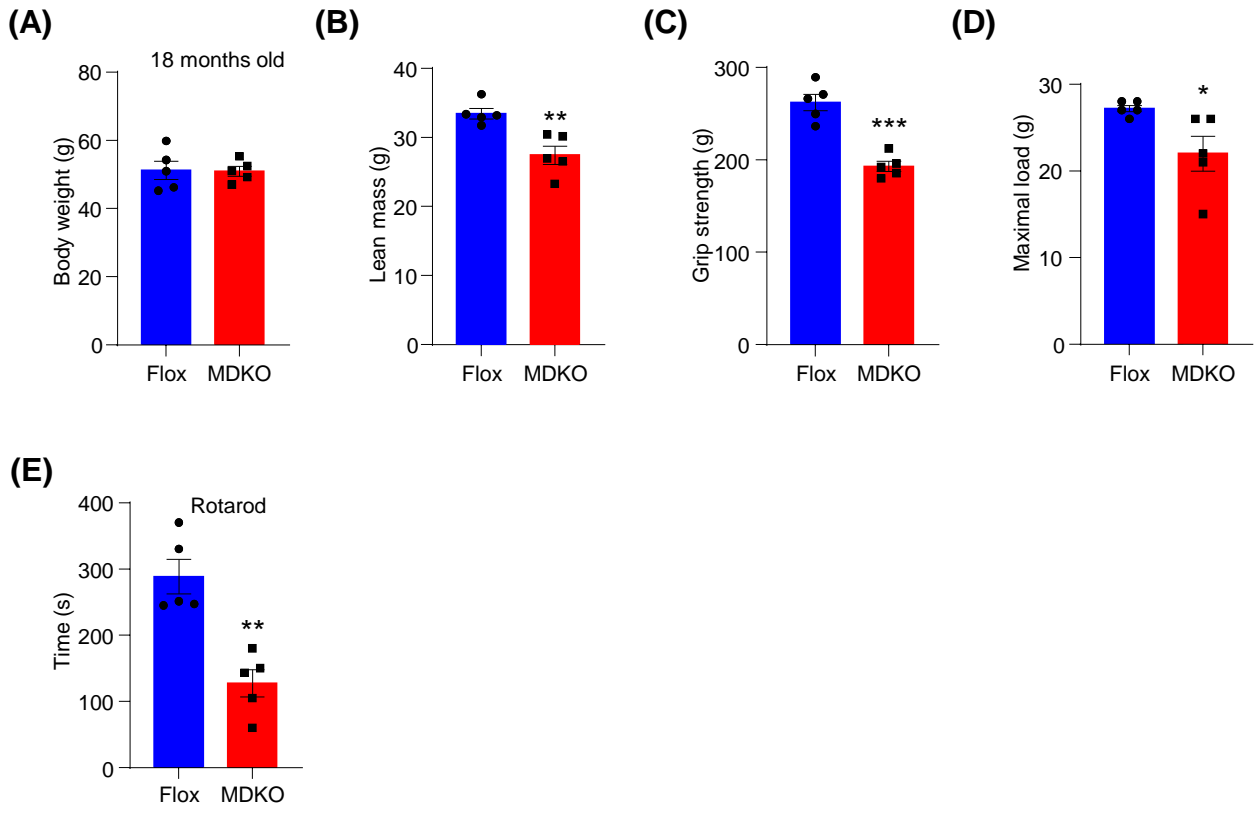

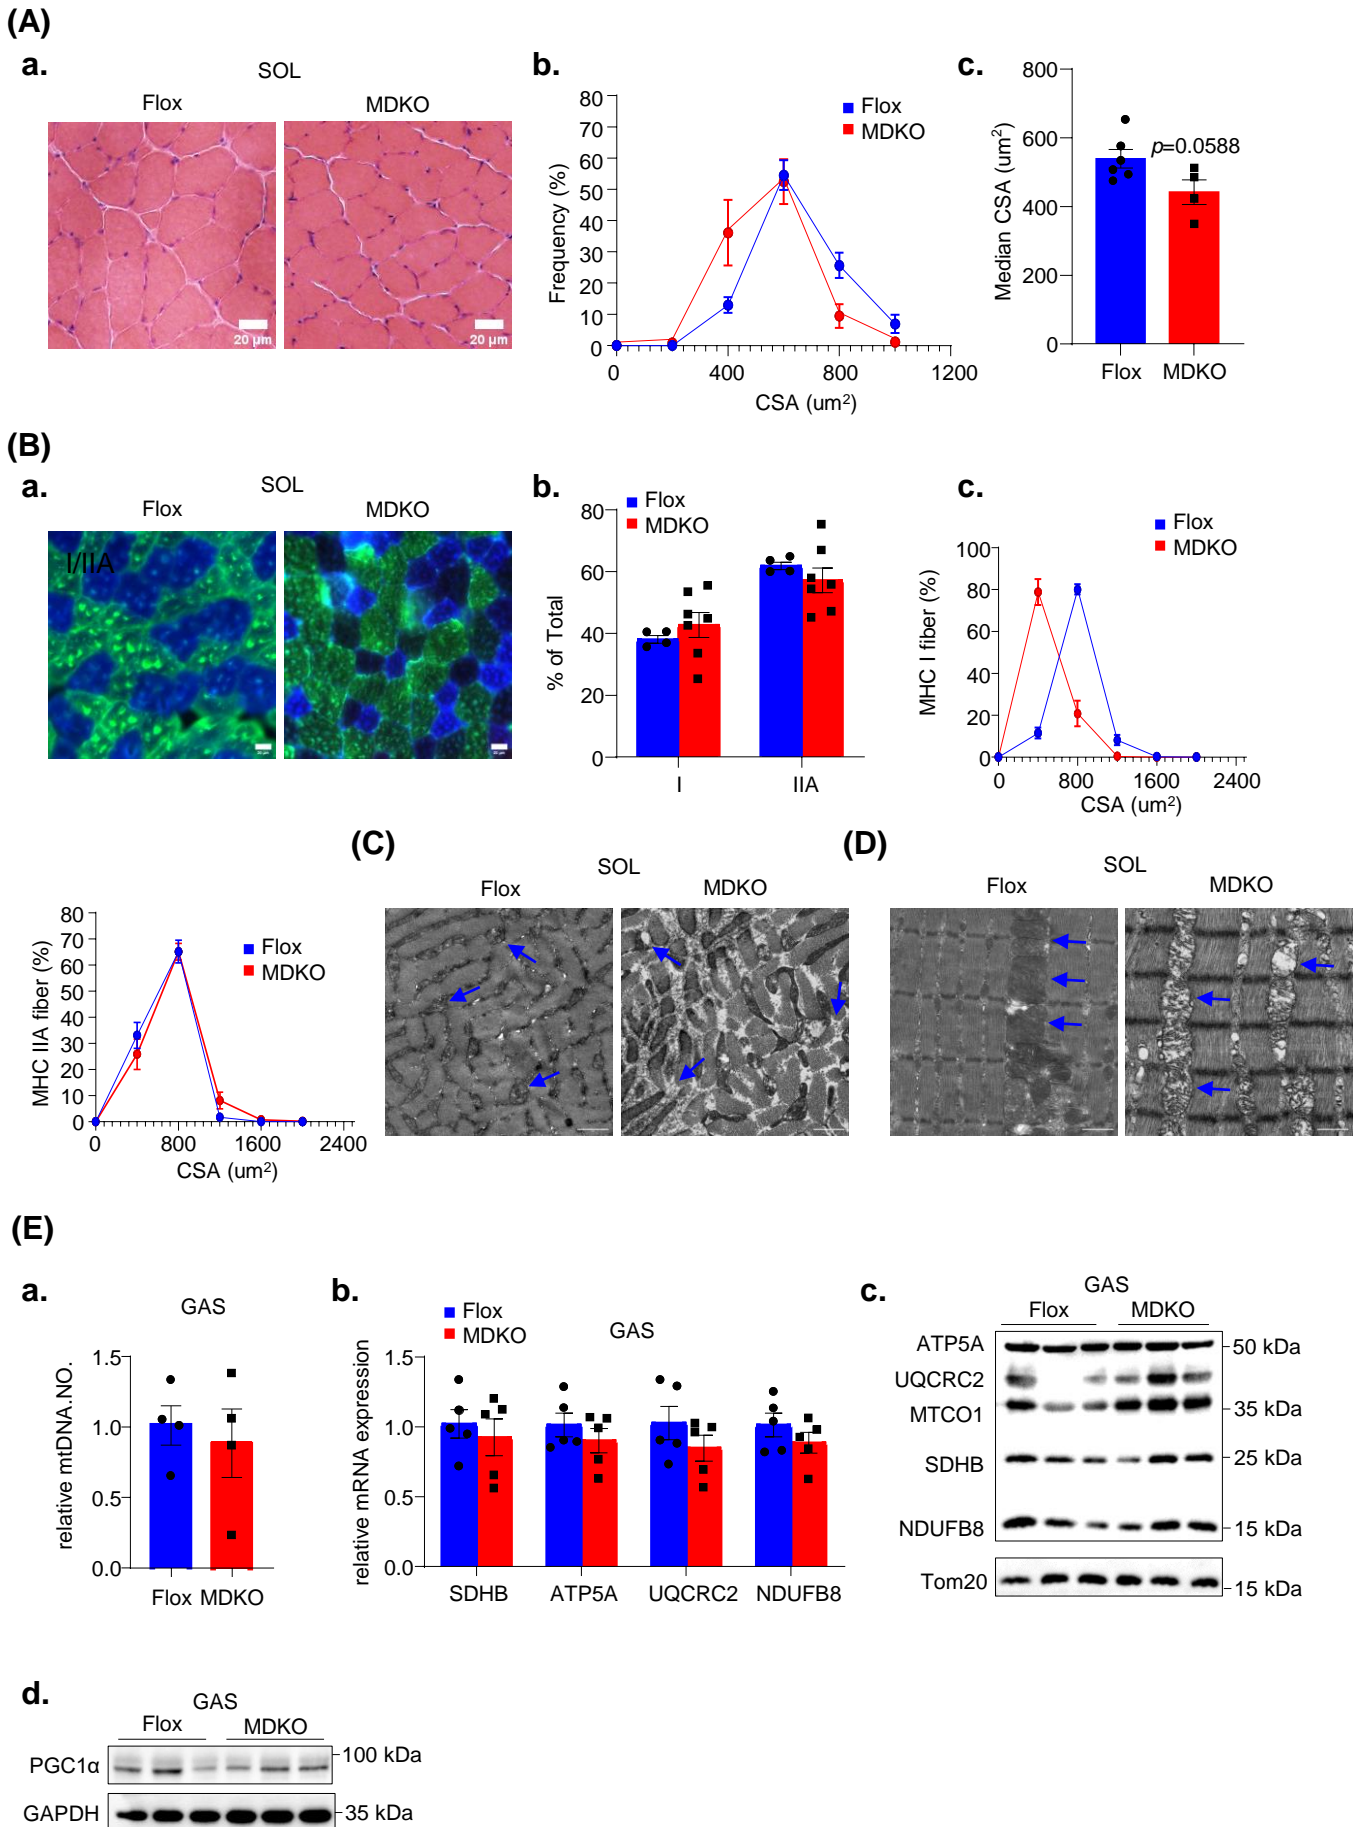

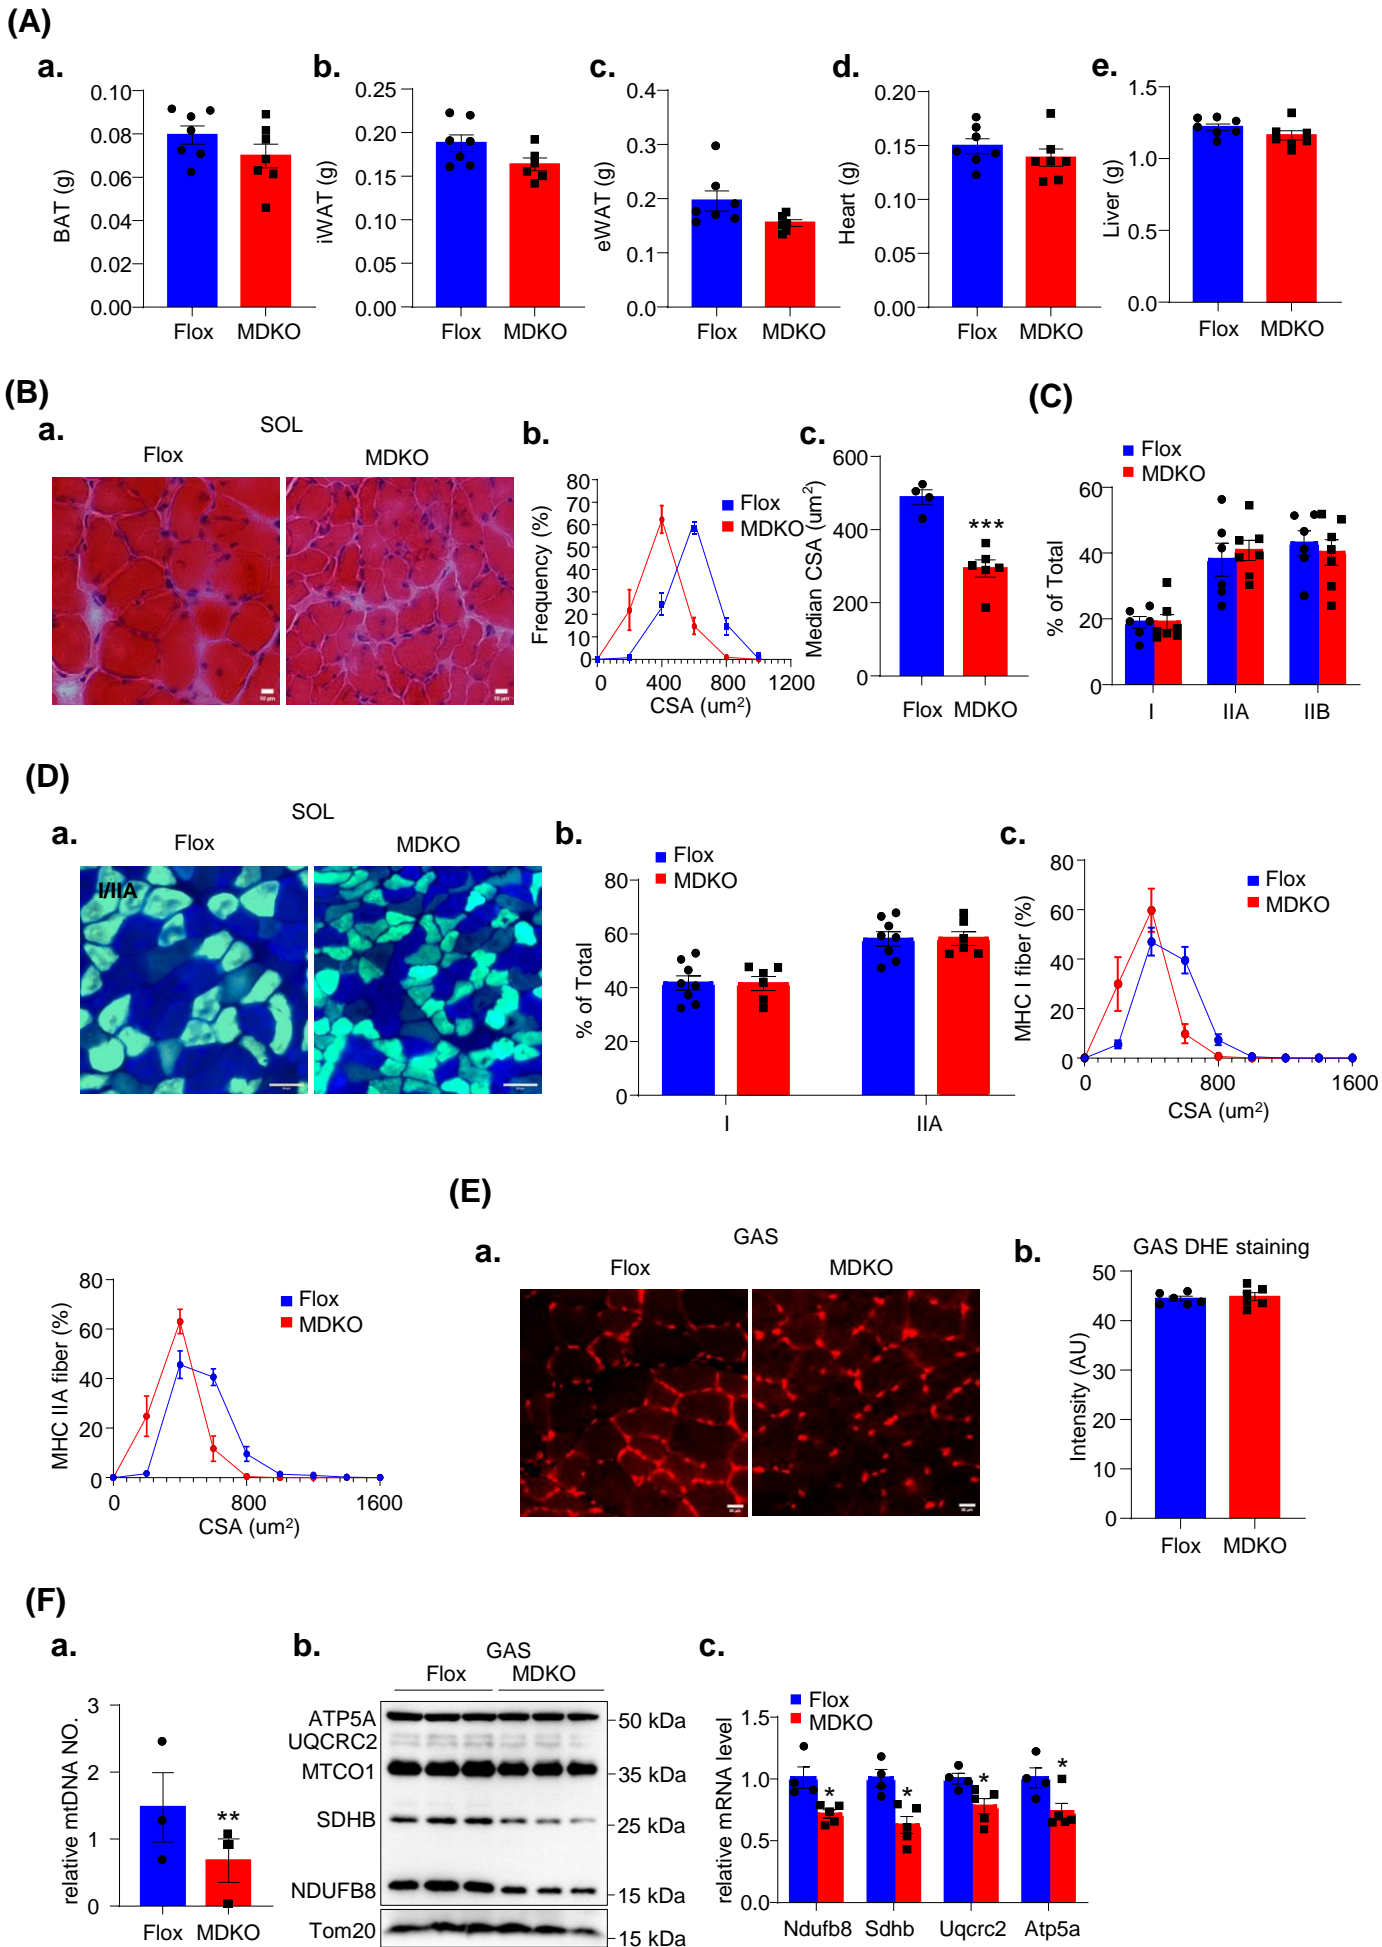

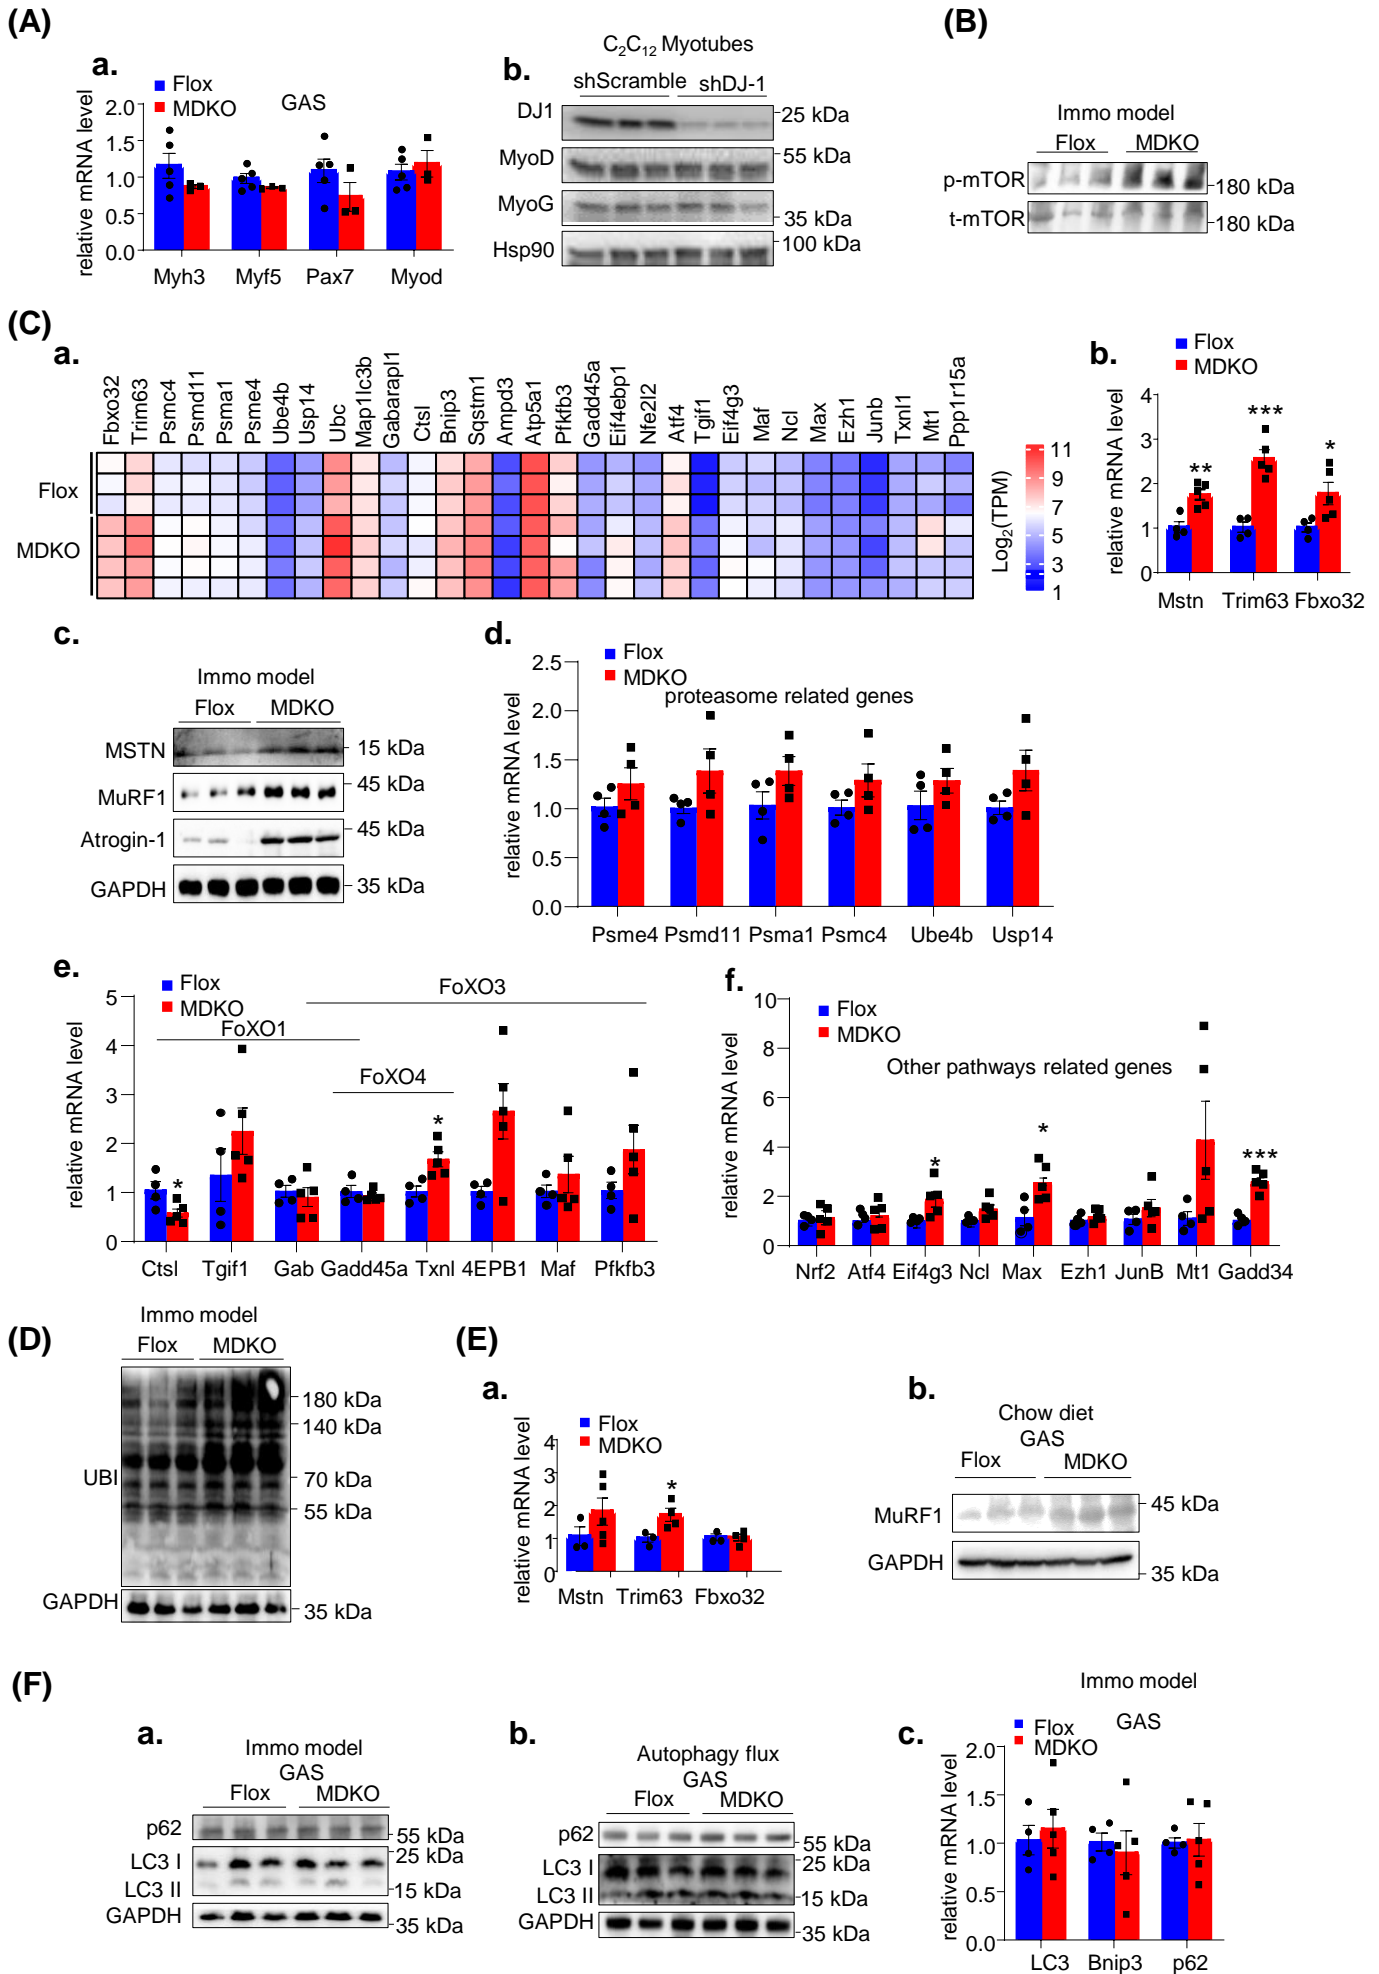

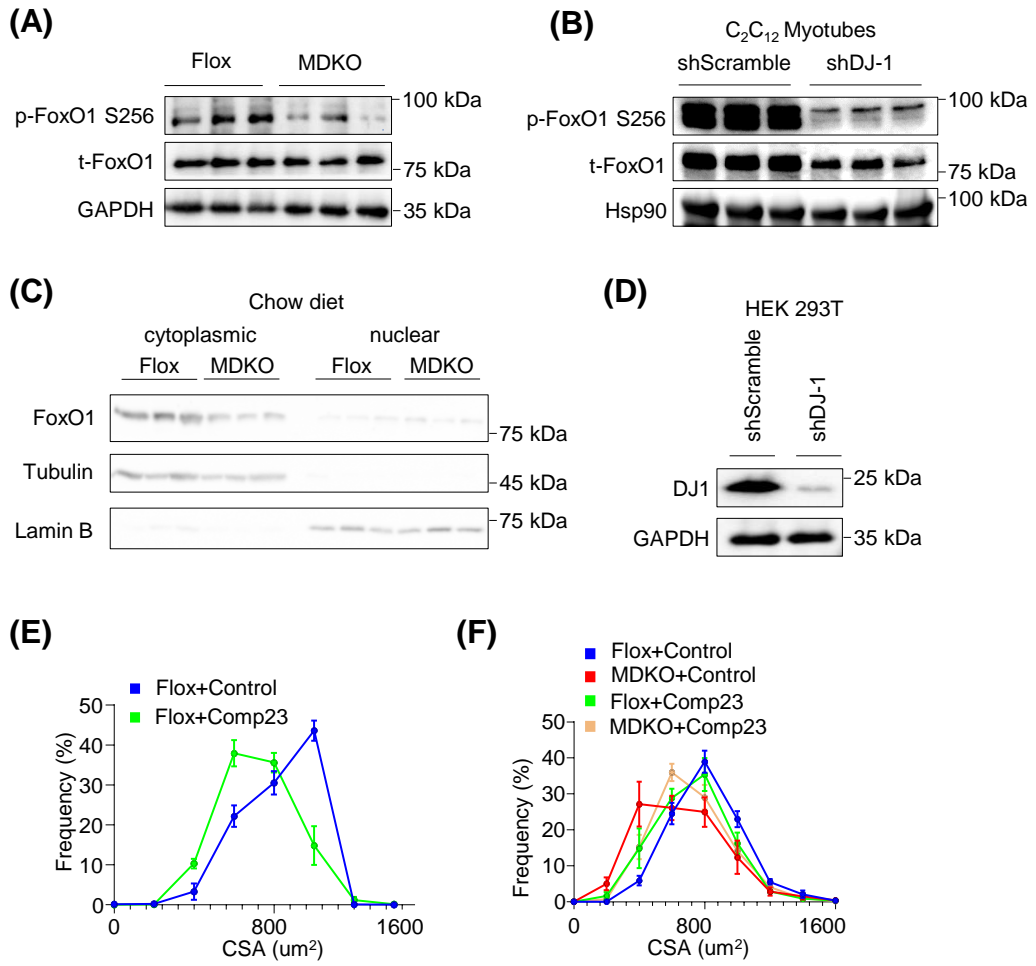

Supplement: JCSM-14-2126-s002.pdf [file JCSM-14-2126-s002.pdf]
